# Supplementary material
Source: publisher site journal article supplement (https://www.dovepress.com/article/supplementary_file/507039/Study+of+relevant+raw+data_1.xlsx)
Supplement: Supplementary file 1 [file Study+of+relevant+raw+data_1.xlsx]

## Sheet: compositional analysis
GXZYT, QZRGF, SLBZS Ingredient Analysis 9 core ingredients
	Compounds	物质	Class I	物质一级分类	Class II	物质二级分类	Formula	Q1 (Da)	Q3 (Da)	Molecular weight (Da)	Ionization model	Level	CAS	cpd_ID	QZRGF	SLBZS	GXZYT	kegg_map	mw_cpd_ID	mw_map
	Nobiletin (5,6,7,8,3',4'-Hexamethoxyflavone)*	川陈皮素 (5,6,7,8,3',4'-六甲氧基黄酮)*	Flavonoids	黄酮	Flavones	黄酮	C21H22O8	403.14	373.1	402.132	[M+H]+	1	478-01-3	C10112	1.25384e+08	135191	7.26691e+07	-	C10112	MetMap120
pme0376	Naringenin (5,7,4'-Trihydroxyflavanone)*	柚皮素*	Flavonoids	黄酮	Flavanones	二氢黄酮	C15H12O5	271.061	151.004	272.068	[M-H]-	1	480-41-1	C00509	4.69967e+06	2.57081e+06	3.63779e+06	ko00941,ko00943,ko01100,ko01110	C00509	-
Wcdp007276	Spirost-5-en-3-ol (Diosgenin)	螺旋甾烷-5-烯-3-醇 (薯蓣皂苷元)	Steroids	甾体	Steroid	甾体	C27H42O3	415.32	271.21	414.313	[M+H]+	2	512-04-9	C08898	77635.1	0	0	-	C08898	-
mws0051	Acacetin*	金合欢素*	Flavonoids	黄酮	Flavones	黄酮	C16H12O5	285.08	242.05	284.068	[M+H]+	2	480-44-4	C01470	3.45496e+07	93526	1.15904e+06	ko00944	C01470	MetMap121
pme0088	Luteolin (5,7,3',4'-Tetrahydroxyflavone)	木犀草素	Flavonoids	黄酮	Flavones	黄酮	C15H10O6	285.04	151	286.048	[M-H]-	3	491-70-3	C01514	3.05836e+06	132197	0	ko00941,ko00944,ko01100,ko01110	C01514	-
mws4061	Licochalcone A	甘草查耳酮 A	Flavonoids	黄酮	Chalcones	查耳酮	C21H22O4	339.16	121.03	338.152	[M+H]+	3	58749-22-7	-	0	1.53862e+07	60509.7	-	CM01206	MetMap125
pme2954	Quercetin	槲皮素	Flavonoids	黄酮	Flavonols	黄酮醇	C15H10O7	303.05	137.02	302.043	[M+H]+	3	117-39-5	C00389	92447	28371.2	76552.5	ko00941,ko00944,ko01100,ko01110	C00389	-
mws1068	Kaempferol (3,5,7,4'-Tetrahydroxyflavone)	山柰酚	Flavonoids	黄酮	Flavonols	黄酮醇	C15H10O6	285.04	151	286.048	[M-H]-	3	520-18-3	C05903	141396	117669	79546.4	ko00941,ko00944,ko01100,ko01110	C05903	MetMap113,MetMap114
mws0041	Baicalein	黄芩素	Flavonoids	黄酮	Flavones	黄酮	C15H10O5	271.06	123.01	270.053	[M+H]+	2	491-67-8	C10023	4.8215e+06	0	0	-	C10023	MetMap110

## Sheet: biochemical index
		8W		Normal	Model	SLBZS	QZRGF	GXZYT	Fenofibrate				12W		Normal	Model	SLBZS	QZRGF	GXZYT	Fenofibrate
			body weight	297	440	354	372	338	388					body weight	328	520	384	417	388	364
				323	495	386	360	366	356						339	495	391	399	359	410
				316	482	376	340	344	394						350	512	411	414	364	409
				322	488	330	379	352	390						367	544	409	400	410	388
				306	523	383	361	326	376						374	498	415	415	373	398
				307	496	398	356	349	389						347	528	400	398	348	390
		8W		Normal	Model	SLBZS	QZRGF	GXZYT	Fenofibrate				12W		Normal	Model	SLBZS	QZRGF	GXZYT	Fenofibrate
			liver weight	6.38	15.95	9.28	10.03	8.05	8.27					liver weight	7.5	14.75	9.71	10.12	8.38	9.59
				6.65	12.45	9.68	8.88	8.2	9.43						7.3	13.3	9.66	8.18	8.67	9.2
				6.71	13.05	9.7	9.3	8.99	10.06						7.5	14.4	9.1	9.1	8.4	8.2
				6.51	12.93	9.1	9.4	7.25	9.59						7.25	13.93	8.76	8.8	9.6	8.35
				7.25	12.08	8.5	8.85	7.22	7.5						6.65	13.65	8.36	10.02	9.17	9.35
				7.5	12.5	9.4	10.42	9.46	9.04						7.1	14.7	8.35	10.22	9.61	8.95
		8W		Normal	Model	SLBZS	QZRGF	GXZYT	Fenofibrate				12W		Normal	Model	SLBZS	QZRGF	GXZYT	Fenofibrate
			liver to body weight ratio	0.0214815	0.03625	0.0262147	0.0269624	0.0238166	0.0213144					liver to body weight ratio	0.0228659	0.0283654	0.0252865	0.0242686	0.0215979	0.0263462
				0.0205882	0.0251515	0.0250777	0.0246667	0.0224044	0.0264888						0.0215339	0.0268687	0.0247059	0.0205013	0.0241504	0.022439
				0.0212342	0.0270747	0.0257979	0.0273529	0.0261337	0.025533						0.0214286	0.028125	0.0221411	0.0219807	0.0230769	0.0200489
				0.0202174	0.0264959	0.0275758	0.0248021	0.0205966	0.0245897						0.0197548	0.0256066	0.0214181	0.022	0.0234146	0.0215206
				0.0236928	0.0230975	0.0221932	0.0245152	0.0221472	0.0199468						0.0177807	0.0274096	0.0201446	0.0241446	0.0245845	0.0234925
				0.02443	0.0252016	0.0236181	0.0292697	0.027106	0.0232391						0.0204611	0.0278409	0.020875	0.0256784	0.0276149	0.0229487
		8W		Normal	Model	SLBZS	QZRGF	GXZYT	Fenofibrate				12W		Normal	Model	SLBZS	QZRGF	GXZYT	Fenofibrate
			TC	0.9	2.1	1.5	1.4	1.2	1.2					TC	0.9	2.7	1.3	1.3	1.1	1.3
				1.1	1.8	1.3	1.3	1.3	1.2						1.2	2	1.1	1.6	1.3	1.6
				1.2	2.4	1.3	1.2	1.2	1.1						1.1	1.9	1.5	1.1	1.2	1.5
				1.2	1.9	1.4	1.5	1.5	1.3						1.2	2.4	1.4	1.1	1.3	1.4
				1.1	1.8	1.3	1.2	1.2	1.4						1.1	2.5	1.2	1.5	1.1	1.6
				1	1.8	1.4	1.4	1.3	1.2						1.2	1.9	1.3	1.5	1.3	1.4
		8W		Normal	Model	SLBZS	QZRGF	GXZYT	Fenofibrate				12W		Normal	Model	SLBZS	QZRGF	GXZYT	Fenofibrate
			TG	0.4	1.77	0.88	0.72	0.85	0.88					TG	0.5	1.85	0.9	0.78	0.87	0.93
				0.41	1.5	1.1	0.77	0.93	0.84						0.57	1.82	0.83	0.89	0.98	0.98
				0.39	1.61	0.89	0.89	0.86	0.97						0.42	1.77	0.78	0.77	0.72	0.89
				0.45	1.66	0.77	0.93	0.92	0.77						0.5	1.94	0.66	0.74	0.93	0.79
				0.31	1.55	1.24	0.82	0.88	0.92						0.42	1.91	0.99	0.83	0.97	0.95
				0.45	1.73	0.96	0.98	0.96	0.85						0.53	1.87	0.92	0.84	0.81	0.82
		8W		Normal	Model	SLBZS	QZRGF	GXZYT	Fenofibrate				12W		Normal	Model	SLBZS	QZRGF	GXZYT	Fenofibrate
			HDL-C	1.42	0.63	1.11	1.18	1.05	0.93					HDL-C	1.36	0.38	1.13	1.19	1.1	0.9
				1.48	0.69	1.23	1.04	1.35	0.99						1.07	0.36	1.15	1.2	0.89	1.17
				1.43	0.67	1.09	1.45	1.07	1.17						1.33	0.47	1	1.11	1.06	0.94
				1.27	0.65	1.06	1.37	1.43	1.15						1.54	0.42	1.17	1.21	1.22	0.97
				1.57	0.72	1.18	1.42	1.02	1.02						1.46	0.36	1.11	1.29	1.1	0.96
				1.73	0.57	1.39	1.25	1	1.17						1.63	0.53	1.26	1.09	1.21	1.12
		8W		Normal	Model	SLBZS	QZRGF	GXZYT	Fenofibrate				12W		Normal	Model	SLBZS	QZRGF	GXZYT	Fenofibrate
			LDL-C	0.37	0.96	0.77	0.69	0.65	0.55					LDL-C	0.2	1.23	0.67	0.71	0.81	0.81
				0.25	1.27	0.69	0.64	0.52	0.68						0.19	1.31	0.71	0.68	0.8	0.76
				0.26	1.04	0.57	0.52	0.56	0.74						0.28	1.66	0.53	0.63	0.71	0.79
				0.3	1.07	0.62	0.75	0.7	0.83						0.37	1.59	0.6	0.58	0.69	0.82
				0.43	1.02	0.75	0.54	0.56	0.55						0.35	1.3	0.81	0.67	0.83	0.63
				0.35	0.96	0.58	0.84	0.89	0.64						0.24	1.3	0.61	0.86	0.75	0.77
		8W		Normal	Model	SLBZS	QZRGF	GXZYT	Fenofibrate				12W		Normal	Model	SLBZS	QZRGF	GXZYT	Fenofibrate
			ALT	27	71	35	35	34	36					ALT	32	78	30	30	37	30
				33	61	34	37	43	42						34	62	59	48	39	31
				22	63	33	31	32	34						29	62	41	45	39	34
				23	57	30	28	28	25						31	79	53	51	41	27
				32	62	38	37	36	45						30	61	47	41	34	37
				28	48	36	29	35	23						32	65	51	42	30	52
		8W		Normal	Model	SLBZS	QZRGF	GXZYT	Fenofibrate				12W		Normal	Model	SLBZS	QZRGF	GXZYT	Fenofibrate
			AST	87	214	116.22	112	117	138					AST	70	203	82	114	107	130
				89	201	120.908	116	113	145						75	193	110	110	123	132
				84	201	116.658	118	109	130						83	143	105	109	99	128
				91	169.12	127.835	120	112	135						87	132	106	129	102	127
				68	266	113.662	106	112	136						93	134	93	113	116	115
				76	181	120.649	119	118	155						82	237	117	102	113	142

## Sheet: Genus
Genus	8-Normal	8-Model	8-GXZYT	8-SLBZS	8-QZRGF	8-Fenofibrate	12-Normal	12-Model	12-GXZYT	12-SLBZS	12-QZRGF	12-Fenofibrate
Unclassified	9.3336	12.4645	12.1293	18.2413	7.31073	18.4188	1.27366	7.44479	3.55678	1.64826	3.74211	0.902997
Lactobacillus	25.205	2.59464	10.0631	12.8233	11.3249	7.89432	31.9519	2.81151	14.791	15.4377	10.3549	14.0063
Romboutsia	0.425868	0.0867508	2.41719	0.370662	13.5213	0.891167	13.4306	5.10252	9.70426	7.56309	7.84306	40.7571
Rodentibacter	0	0.0946372	0.0670347	0.0118297	2.58281	0.102524	10.1025	1.22634	0.0985804	2.02681	0.0591483	0.654574
Bacteroides	4.60568	37.4606	10.7019	6.03312	0.0433754	6.55757	0.0276025	0.709779	0.0473186	0.347003	0.374606	0.0197161
f__Muribaculaceae_Unclassified	2.6459	3.7224	7.93375	4.75158	0.0788644	6.5694	0.0433754	2.7011	0.145899	0.477129	2.89826	0.252366
Streptococcus	0.0630915	0.0670347	0.153785	0.161672	2.70899	0.228707	4.23896	0.910883	4.66088	18.3241	0.414038	1.13959
Alloprevotella	0	0.126183	1.87303	1.2224	0.00394322	2.30678	0.0867508	0.130126	0.0157729	0.559937	0.23265	0
Weissella	0	0.00788644	0	0	0.165615	0	3.86041	1.25789	26.7468	0.0630915	0.0394322	2.3265
[Eubacterium]_coprostanoligenes_group	2.21609	1.78628	4.61751	4.37697	0.90694	4.94874	0.0236593	5.28785	0.035489	0.161672	0.922713	0.055205
Lachnospiraceae_NK4A136_group	0.559937	0.153785	0.540221	2.70899	0.299685	4.94479	0.307571	1.1317	0.090694	0.390379	0.224763	0.161672
Allobaculum	0.638801	0.090694	0.33123	0.0749211	1.85726	0.149842	1.66798	6.94006	1.62066	0.0788644	14.5032	7.31467
Blautia	0.587539	1.26183	3.27681	0.256309	0.358833	0.946372	0.205047	3.7224	15.2681	0.327287	1.00158	0.473186
Ruminococcaceae_UCG-014	1.64432	2.45662	6.62461	7.28707	0.701893	6.1317	0.0828076	0.500789	0.138013	0.106467	0.283912	0.090694
Clostridium_sensu_stricto_1	0.12224	0.0157729	0.429811	0.205047	10.7729	0.212934	0.161672	0.0788644	1.08438	0.193218	0.173502	9.09306
Staphylococcus	0.0670347	0.00394322	0	0.00394322	13.2413	0.00788644	10.4771	4.69637	0.118297	0.0867508	0.090694	0.0473186
Ruminococcus_1	0.555994	0.800473	3.15457	6.3683	0.244479	4.60174	0.0118297	1.25789	0	0.153785	0.559937	0.00394322
Ruminococcaceae_UCG-005	1.03312	2.78785	7.2358	4.01814	0.650631	4.21924	0.0433754	9.65694	0.035489	0.0828076	0.646688	0.0236593
Megamonas	0	6.01735	4.097	0.0118297	0.055205	1.09227	0.0276025	0.295741	0.0197161	0.106467	0.0709779	0.0118297
Desulfovibrio	0.757098	0.118297	0.090694	0.745268	0.0394322	0.485016	0.134069	8.57256	0.0197161	0.0276025	19.9448	0.0946372
Fusobacterium	0	0.0157729	0	0.00394322	0.0630915	0.00394322	0.977918	0.386435	0.0591483	6.17114	0	0.0867508
Corynebacterium_1	0.0157729	0	0	0	17.8746	0	6.07256	6.94795	0.587539	0.0946372	0.0512618	0.0118297
Prevotella_9	0	0	0.350946	4.25473	0.0118297	2.12145	0.0670347	0.0197161	0.00394322	0.272082	0.0749211	0.00788644
Parasutterella	17.1175	2.04259	0.44164	0.417981	0.00788644	0.327287	0	6.75868	0.0788644	0.0512618	15.3391	0.0315457
Ruminococcaceae_NK4A214_group	1.34069	0.504732	1.45899	3.36751	0.165615	2.26735	0.0118297	2.40931	0.0315457	0.090694	0.57571	0.00394322
Christensenellaceae_R-7_group	3.54495	3.01262	3.4582	1.87697	0.208991	2.153	0.0157729	0.599369	0.0157729	0.0473186	0.0946372	0.00394322
Gemella	0.106467	0.0630915	0	0	0.690063	0.205047	2.64984	1.06861	0.508675	12.6498	1.03312	0.216877
Ruminiclostridium_9	0.445584	0.646688	0.126183	2.59464	0.0591483	2.2989	0.0946372	0.141956	0.0276025	0.228707	0.0512618	0.00394322
Bifidobacterium	0.630915	0.0157729	0.358833	0.0315457	0.374606	0.157729	0.481073	0.208991	4.77918	0.272082	0.879338	9.79101
Veillonella	0.00788644	0.256309	0.0749211	0.126183	0.0157729	0.153785	2.72476	1.02524	0.145899	16.0174	0.201104	0.279968
Others	26.3289	21.3249	17.9929	17.6538	13.6593	19.6017	8.74606	15.9976	15.5639	15.9424	17.3186	12.1333

## Sheet: Phylum
Taxon	8-Normal	8-Model	8-GXZYT	8-SLBZS	8-QZRGF	8-Fenofibrate	12-Normal	12-Model	12-GXZYT	12-SLBZS	12-QZRGF	12-Fenofibrate
Firmicutes	63.1033	88.5607	75.556	70.2326	70.9385	86.9874	57.4487	67.1885	65.761	62.6144	64.8935	67.0505
Bacteroidetes	27.8036	7.97319	18.1033	26.2658	26.1593	8.1664	35.2918	5.52839	17.9377	31.3841	24.9211	12.3028
Proteobacteria	7.8194	1.63644	2.14117	1.82177	0.658517	3.8959	5.0276	17.5591	7.37382	4.3336	7.49211	14.3651
Actinobacteria	0.090694	0.611199	0.433754	0.299685	0.835962	0.165615	1.36435	7.92192	3.42666	0.90694	0.429811	2.58675
Fusobacteria	0	0	0.00394322	0.0157729	0	0.0157729	0.0197161	0.386435	0.402208	0.0157729	0.0394322	0.0670347
Patescibacteria	0.272082	0.804416	0.0236593	0.520505	0.35489	0.208991	0.0473186	0.153785	0.055205	0.0828076	1.57729	0.0709779
Tenericutes	0.0157729	0.153785	0.0197161	0.212934	0.189274	0.0276025	0	0.126183	0.00394322	0	0	0.0315457
Epsilonbacteraeota	0.532334	0.0433754	0.145899	0.504732	0.145899	0.382492	0.126183	0	4.77918	0.0630915	0.520505	3.24132
Verrucomicrobia	0.181388	0.149842	3.52918	0.0512618	0.421924	0.0276025	0	0.402208	0.00394322	0.0118297	0	0.0157729
Cyanobacteria	0.0315457	0.0118297	0	0.0630915	0.00788644	0.0473186	0.662461	0.666404	0.22082	0.57571	0.0985804	0.193218
Euryarchaeota	0	0.0118297	0	0	0.00394322	0	0.0118297	0.055205	0.0118297	0.00788644	0.00788644	0.0157729
Elusimicrobia	0.145899	0.0157729	0	0	0.256309	0.00788644	0	0.00394322	0	0	0.00788644	0.00394322
Deferribacteres	0	0.0276025	0.0433754	0.0118297	0.0197161	0	0	0.00788644	0.0157729	0	0.00394322	0.0236593
Unclassified	0.00394322	0	0	0	0.00788644	0.0670347	0	0	0.00788644	0.00394322	0.00788644	0.0315457
Deinococcus-Thermus	0	0	0	0	0	0	0	0	0	0	0	0
Gemmatimonadetes	0	0	0	0	0	0	0	0	0	0	0	0

## Sheet: cog_predicted_metagenomes.L2
COG ID	8-Normal01	8-Normal02	8-Normal03	8-Model01	8-Model02	8-Model03	8-GXZYT01	8-GXZYT02	8-GXZYT03	8-SLBZS01	8-SLBZS02	8-SLBZS03	8-QZRGF01	8-QZRGF02	8-QZRGF03	8-Fenofibrate01	8-Fenofibrate02	8-Fenofibrate03	12-Normal01	12-Normal02	12-Normal03	12-Model01	12-Model02	12-Model03	12-GXZYT01	12-GXZYT02	12-GXZYT03	12-SLBZS01	12-SLBZS02	12-SLBZS03	12-QZRGF01	12-QZRGF02	12-QZRGF03	12-Fenofibrate01	12-Fenofibrate02	12-Fenofibrate03
[A] RNA processing and modification	5.75959e-05	6.74892e-05	3.72059e-05	5.90833e-05	0.000134196	3.45215e-05	4.89315e-05	0.000118364	5.82329e-05	4.88604e-05	2.31308e-05	0.000255213	2.7275e-05	4.69509e-05	5.05501e-05	0.000118703	0.000107065	0.000106937	0.000102407	3.51831e-05	5.45691e-05	0.000179918	0.000314689	0.000225865	8.84039e-05	0.000314667	0.000184272	0.000218171	6.51063e-05	7.17612e-05	0.00010738	1.55102e-05	6.84718e-05	9.05421e-06	0.000137634	3.78059e-05
[B] Chromatin structure and dynamics	0.000155673	0.000132152	0.000113798	7.871e-05	8.42996e-05	0.000125978	7.55273e-05	0.000137239	8.10731e-05	0.000171752	8.36846e-05	0.00016962	0.000154627	0.000155345	0.000152154	0.000104962	8.82726e-05	0.000115557	0.00032455	0.000143719	0.000561707	0.000288882	0.000115425	0.00032941	0.000118621	0.000190132	0.000291625	0.000142447	0.00014346	0.000101983	9.67961e-05	1.29793e-05	0.000144711	0.000306715	0.000200956	9.42285e-05
[C] Energy production and conversion	0.0515231	0.0504717	0.0508914	0.0535592	0.0556763	0.0525713	0.050723	0.0503514	0.0511301	0.0514712	0.0531822	0.0552504	0.052104	0.0521447	0.0518164	0.0529157	0.056627	0.0492504	0.0532488	0.0541378	0.0621102	0.0560342	0.0595775	0.053851	0.0486364	0.0577154	0.0556876	0.0573056	0.0442347	0.0441904	0.055156	0.0537083	0.052606	0.0564239	0.0547953	0.0500344
[D] Cell cycle control, cell division, chromosome partitioning	0.0141479	0.0138526	0.0135852	0.01337	0.0115804	0.0137697	0.0123455	0.0128978	0.0132279	0.0142034	0.0139005	0.0129318	0.013993	0.0137678	0.0137256	0.0136571	0.0137258	0.0130385	0.0129245	0.0134233	0.0132779	0.0133164	0.0126176	0.0126516	0.0134508	0.0130608	0.0124912	0.0131997	0.0143869	0.0133777	0.0136644	0.0131861	0.0141923	0.0150337	0.0133816	0.0148035
[E] Amino acid transport and metabolism	0.0773083	0.076577	0.0790103	0.0761705	0.0748444	0.07319	0.0835442	0.0763456	0.0791874	0.0764832	0.0825302	0.0797454	0.0774423	0.0790816	0.0795006	0.0778576	0.0752392	0.0790034	0.0857506	0.082354	0.0834523	0.081443	0.0887749	0.086751	0.0790322	0.0853131	0.0871159	0.0865991	0.0830591	0.0818079	0.0848626	0.0840469	0.0838027	0.0817455	0.0797136	0.0732716
[F] Nucleotide transport and metabolism	0.0303754	0.0292141	0.029015	0.0293368	0.0349297	0.0293809	0.027894	0.0274572	0.0290278	0.0286866	0.0296185	0.0296846	0.0295355	0.028819	0.03068	0.0307851	0.0317507	0.0272397	0.031823	0.0301802	0.0292603	0.029291	0.0317809	0.0332965	0.027756	0.0362979	0.0322131	0.0309039	0.0389768	0.0424125	0.030184	0.02723	0.0290096	0.0293612	0.0296326	0.0318601
[G] Carbohydrate transport and metabolism	0.0850307	0.0918233	0.0858467	0.0876474	0.0982806	0.0880862	0.105104	0.0970712	0.0937026	0.0859047	0.0796678	0.0844434	0.0881201	0.085826	0.0847202	0.0847136	0.0766657	0.0992186	0.0767303	0.0751749	0.0686215	0.0771531	0.0818041	0.0759432	0.0986113	0.0684369	0.0788036	0.0875779	0.0883926	0.0920609	0.077536	0.072897	0.083802	0.0963548	0.0863953	0.0873341
[H] Coenzyme transport and metabolism	0.038425	0.0379025	0.0374626	0.039929	0.0361759	0.0414804	0.0342643	0.0374058	0.0365993	0.0391138	0.0354296	0.0381479	0.040411	0.0420533	0.0420638	0.0407646	0.0458567	0.0339684	0.0412915	0.0384643	0.0442564	0.0421243	0.0465412	0.0439102	0.0392372	0.0437592	0.0447059	0.0444409	0.0373413	0.0371787	0.0397684	0.0346494	0.0441105	0.041766	0.0395635	0.0425651
[I] Lipid transport and metabolism	0.0243389	0.0234046	0.0235642	0.0239189	0.0233552	0.024368	0.0217526	0.0229124	0.022598	0.0242024	0.0230449	0.022941	0.0234702	0.0237022	0.0237875	0.0242254	0.026326	0.0221173	0.0260835	0.0251945	0.0256587	0.0232815	0.0252323	0.0284499	0.0217694	0.0245391	0.0263386	0.0238887	0.0249961	0.0278237	0.0233963	0.0231328	0.0216949	0.0213024	0.0220067	0.0237789
[J] Translation, ribosomal structure and biogenesis	0.0673018	0.0642706	0.0639502	0.0658435	0.103249	0.0661634	0.0577488	0.0599942	0.0626735	0.0655197	0.0650874	0.0673035	0.0665042	0.0640784	0.0673425	0.0689998	0.0751581	0.0572153	0.0686275	0.0670263	0.0702544	0.0668964	0.0731658	0.0705282	0.0615451	0.0761065	0.0670873	0.0689265	0.0800111	0.0802506	0.0679947	0.0599227	0.0630626	0.0602439	0.0655103	0.0695972
[K] Transcription	0.0935939	0.0944801	0.0959296	0.0883191	0.0736714	0.0860127	0.099839	0.0933831	0.0953414	0.0918223	0.0992856	0.084477	0.0890751	0.0879079	0.086367	0.08369	0.0674509	0.104243	0.0887083	0.0929818	0.0854106	0.0830089	0.0656248	0.0785036	0.0879924	0.078466	0.0802473	0.0787111	0.0792912	0.0747002	0.0888148	0.106654	0.0893029	0.0955125	0.0857447	0.0832012
[L] Replication, recombination and repair	0.0730755	0.0704384	0.0733905	0.0700671	0.0715744	0.0701028	0.0628991	0.0654884	0.069586	0.0713714	0.0770888	0.0705996	0.0719024	0.0709922	0.0724709	0.0713251	0.0703442	0.0677032	0.0735501	0.0780901	0.0733061	0.0705309	0.063928	0.0662266	0.0617482	0.0759813	0.0656012	0.067104	0.0720008	0.0671396	0.0768513	0.0823875	0.0725361	0.070483	0.0678779	0.0748108
[M] Cell wall/membrane/envelope biogenesis	0.0619296	0.0621095	0.060591	0.0705245	0.0487877	0.0730832	0.0566635	0.0638022	0.0609116	0.0648924	0.0549005	0.0622668	0.0651511	0.0656903	0.0628257	0.0717504	0.0846489	0.0555699	0.0539343	0.0551926	0.0569997	0.0623662	0.0664598	0.057654	0.0630183	0.0597348	0.0580661	0.062649	0.0583637	0.0607984	0.0585079	0.0518156	0.0593093	0.0583093	0.0619714	0.0716653
[N] Cell motility	0.0126836	0.0134688	0.0132738	0.011114	0.00716106	0.00975154	0.0143156	0.0156065	0.0139466	0.0133178	0.0136641	0.0133302	0.0119892	0.0123864	0.0126022	0.0102353	0.00961749	0.0153397	0.0100807	0.0152273	0.0144723	0.0138022	0.0100405	0.00779978	0.019918	0.00660582	0.0093463	0.00706021	0.00577454	0.0045372	0.0127719	0.0197262	0.0168357	0.00412652	0.0156531	0.0117489
[O] Post-translational modification, protein turnover, and chaperones	0.0289036	0.0284858	0.0284731	0.0303117	0.0380052	0.0307636	0.0262417	0.028471	0.0283427	0.0294726	0.0284392	0.0309456	0.0295219	0.0296664	0.029822	0.0313637	0.0355154	0.025788	0.0301947	0.0299583	0.0334765	0.0308261	0.0403971	0.0332205	0.0292877	0.0318741	0.033369	0.0369614	0.0308214	0.0300692	0.0317464	0.0273343	0.0289119	0.028678	0.0302505	0.0325145
[P] Inorganic ion transport and metabolism	0.0428341	0.0427855	0.0441839	0.0450039	0.047435	0.0460908	0.0422255	0.0432613	0.042245	0.0425369	0.041734	0.0473728	0.0434105	0.0456683	0.044762	0.0459903	0.0507782	0.0417274	0.0509668	0.0447249	0.0453553	0.0457097	0.0536635	0.0527446	0.044339	0.0479498	0.053157	0.0494478	0.0464263	0.0494697	0.0441971	0.0418178	0.0443282	0.0393255	0.0443886	0.0446846
[Q] Secondary metabolites biosynthesis, transport, and catabolism	0.0110625	0.010622	0.0106721	0.0102386	0.0094834	0.0107958	0.0107902	0.0106092	0.0102085	0.011467	0.0103722	0.0101931	0.010611	0.0109638	0.0110342	0.00998893	0.0102282	0.01115	0.0125798	0.0112508	0.0117239	0.0119428	0.011338	0.0142918	0.0105995	0.0118728	0.0136088	0.0107644	0.0098177	0.0124223	0.00997823	0.0108215	0.0103113	0.0103558	0.0105925	0.00982375
[R] General function prediction only	0.113322	0.112867	0.113218	0.113334	0.106563	0.113139	0.117385	0.113734	0.114736	0.113237	0.115424	0.112421	0.112889	0.113965	0.113972	0.113086	0.112314	0.114812	0.115456	0.113723	0.116457	0.115087	0.108283	0.115708	0.111723	0.11642	0.1135	0.109322	0.114095	0.11827	0.112778	0.111579	0.112358	0.112481	0.113174	0.112665
[S] Function unknown	0.0703217	0.0694348	0.0704093	0.0657502	0.0731222	0.066863	0.0689511	0.0693299	0.0689852	0.0689282	0.070715	0.0748367	0.0696292	0.0696585	0.0725187	0.0667835	0.0634807	0.0701561	0.0777828	0.0724529	0.0658731	0.0755834	0.0819275	0.0834564	0.0692003	0.0772757	0.0824102	0.0790061	0.0859302	0.089777	0.0750019	0.0690672	0.0719187	0.0717355	0.0730018	0.0674075
[T] Signal transduction mechanisms	0.0557974	0.0588579	0.0580142	0.0550052	0.0393513	0.0539708	0.0615563	0.0625443	0.0592999	0.0580286	0.0591275	0.0546647	0.0560221	0.0556694	0.0533897	0.0526632	0.0436373	0.0640774	0.0481111	0.0553618	0.0561192	0.0556208	0.0350373	0.0438561	0.0632311	0.0456095	0.0439395	0.0437432	0.0411049	0.0346209	0.0508253	0.0628503	0.0563881	0.0641864	0.0597054	0.0514341
[U] Intracellular trafficking, secretion, and vesicular transport	0.0182276	0.017894	0.0177267	0.0194346	0.0207673	0.0191829	0.0168261	0.0187715	0.017677	0.0184511	0.0159752	0.0206387	0.0179938	0.0187718	0.0187105	0.0193689	0.0237834	0.0170333	0.0153862	0.0178265	0.0180679	0.0179732	0.0243243	0.0171063	0.0192689	0.0187195	0.0184913	0.0186178	0.0155313	0.0154826	0.0184183	0.0179251	0.0189161	0.0102891	0.0179791	0.0179749
[V] Defense mechanisms	0.0294353	0.0306795	0.0304511	0.0308618	0.0255965	0.0309279	0.0287188	0.030157	0.0302767	0.0304437	0.0304951	0.0272382	0.0298967	0.0288214	0.0275373	0.0295064	0.0265981	0.0309403	0.0261883	0.0268373	0.0250434	0.0273701	0.018746	0.0234061	0.0292635	0.0237019	0.0232531	0.0231398	0.0291979	0.0233875	0.0270767	0.0288532	0.0262533	0.0319506	0.028201	0.0285942
[W] Extracellular structures	1.48827e-07	4.82558e-07	2.70949e-06	1.895e-06	8.68058e-05	3.22029e-07	6.33232e-07	1.82661e-07	1.9411e-07	6.43746e-08	1.19102e-06	1.37124e-05	2.73434e-07	6.67865e-08	1.00669e-06	3.65466e-07	1.96544e-05	6.73409e-07	1.19972e-05	1.14363e-05	3.10195e-05	5.61601e-06	0.00027641	4.56761e-05	6.24321e-08	1.5764e-06	5.87075e-05	0.000199065	3.69689e-06	4.07401e-05	7.43611e-05	6.42474e-06	0	1.37602e-07	1.85301e-06	1.43204e-07
[Y] Nuclear structure	0	0	0	0	0	0	0	0	0	0	0	0	0	0	0	0	0	0	0	0	0	0	0	0	0	0	0	0	0	0	0	0	0	0	0	0
[Z] Cytoskeleton	0.000148157	0.000160485	0.000187021	0.000120468	8.5135e-05	0.000144977	8.72133e-05	0.000150269	0.000156905	0.000225182	0.000210058	0.000129047	0.000145809	0.000162959	0.00014748	0.000105547	3.87055e-05	0.000184783	0.000141849	0.000227415	0.000155857	0.000164576	2.94728e-05	4.33536e-05	0.000164946	5.37728e-05	3.19315e-05	7.13233e-05	3.4607e-05	8.52081e-06	0.000191421	0.000360499	0.000137159	1.93193e-05	0.000120957	9.78086e-05

## Sheet: predictions_ko.L1
CategoryL1	8-Normal01	8-Normal02	8-Normal03	8-Model01	8-Model02	8-Model03	8-GXZYT01	8-GXZYT02	8-GXZYT03	8-SLBZS01	8-SLBZS02	8-SLBZS03	8-QZRGF01	8-QZRGF02	8-QZRGF03	8-Fenofibrate01	8-Fenofibrate02	8-Fenofibrate03	12-Normal01	12-Normal02	12-Normal03	12-Model01	12-Model02	12-Model03	12-GXZYT01	12-GXZYT02	12-GXZYT03	12-SLBZS01	12-SLBZS02	12-SLBZS03	12-QZRGF01	12-QZRGF02	12-QZRGF03	12-Fenofibrate01	12-Fenofibrate02	12-Fenofibrate03
Cellular Processes	0.0328087	0.0354185	0.034708	0.0319683	0.0177893	0.0292147	0.0390138	0.0396592	0.0367327	0.0352498	0.0344218	0.0314723	0.031979	0.0331768	0.0318007	0.0294332	0.0263662	0.0410512	0.0255428	0.0352752	0.0325477	0.0348797	0.021255	0.0204835	0.0484776	0.0182518	0.0201056	0.020151	0.0158429	0.0121835	0.0220653	0.0376186	0.0211198	0.0178363	0.0385737	0.0317121
Environmental Information Processing	0.139521	0.146497	0.144339	0.130668	0.150482	0.126278	0.179172	0.154603	0.15471	0.13744	0.153909	0.156294	0.141287	0.138689	0.141704	0.12804	0.104316	0.170334	0.152082	0.14441	0.136686	0.15317	0.151168	0.151921	0.162917	0.140971	0.154424	0.152966	0.160897	0.157566	0.153909	0.155239	0.158622	0.160536	0.159665	0.126406
Genetic Information Processing	0.209488	0.203518	0.204795	0.20374	0.245488	0.205332	0.18826	0.193486	0.199188	0.207554	0.207368	0.200984	0.206947	0.202082	0.206975	0.207158	0.210245	0.191966	0.202695	0.208218	0.207539	0.198463	0.199653	0.198308	0.188789	0.211746	0.193852	0.201718	0.213497	0.215462	0.212994	0.198091	0.200264	0.196746	0.197429	0.211453
Human Diseases	0.00680924	0.00674736	0.00691214	0.00724101	0.00737568	0.00732131	0.00628524	0.00675041	0.00681538	0.0069846	0.00684567	0.00749602	0.00692003	0.00678068	0.00701472	0.00744113	0.00869056	0.00642041	0.00758795	0.00723822	0.0066481	0.00707593	0.00828571	0.00825299	0.007468	0.00770522	0.0086103	0.00731784	0.00839893	0.00822195	0.00818209	0.00661957	0.0066716	0.00637566	0.00749496	0.0070571
Metabolism	0.464812	0.461814	0.461411	0.479209	0.443336	0.482286	0.444567	0.459516	0.457657	0.465415	0.451138	0.454336	0.465941	0.470197	0.465112	0.481209	0.500865	0.445005	0.4679	0.459336	0.475611	0.456802	0.455468	0.472691	0.447219	0.473047	0.471055	0.458634	0.462993	0.462416	0.459889	0.457301	0.465449	0.469744	0.449443	0.475896
None	0.0018283	0.00189142	0.00198475	0.00196521	0.000928757	0.00185859	0.00182722	0.00181409	0.00191969	0.00190327	0.00209366	0.00207818	0.00208287	0.00201086	0.00193865	0.00185211	0.00180954	0.00183575	0.0016955	0.00200507	0.00173484	0.00181175	0.00160743	0.00162308	0.00168694	0.00178503	0.00169549	0.00190672	0.00114387	0.00124194	0.00138674	0.00189248	0.0023322	0.0028128	0.00171651	0.00201137
Organismal Systems	0.00709911	0.00695018	0.00688481	0.00722739	0.00506393	0.0077092	0.00602666	0.00672403	0.00654507	0.00740427	0.0063552	0.00650783	0.00699884	0.00743007	0.00689169	0.00747329	0.00773453	0.00641299	0.00607865	0.00609172	0.0057732	0.00680435	0.00660721	0.00659026	0.00659789	0.00626653	0.00586655	0.0064275	0.00537541	0.00494006	0.00520209	0.00681956	0.00612187	0.00577347	0.00632401	0.00767598
Unclassified	0.137634	0.137163	0.138965	0.137982	0.129537	0.139999	0.134848	0.137447	0.136433	0.13805	0.137868	0.140831	0.137845	0.139633	0.138563	0.137394	0.139974	0.136975	0.136418	0.137426	0.13346	0.140993	0.155956	0.14013	0.136845	0.140228	0.144391	0.150878	0.131852	0.137968	0.136373	0.136419	0.139419	0.140176	0.139354	0.137789

## Sheet: Observed_OTUs
SampleID	8-Normal01	8-Normal02	8-Normal03	8-Model01	8-Model02	8-Model03	8-GXZYT01	8-GXZYT02	8-GXZYT03	8-SLBZS01	8-SLBZS02	8-SLBZS03	8-QZRGF01	8-QZRGF02	8-QZRGF03	8-Fenofibrate01	8-Fenofibrate02	8-Fenofibrate03	12-Normal01	12-Normal02	12-Normal03	12-Model01	12-Model02	12-Model03	12-GXZYT01	12-GXZYT02	12-GXZYT03	12-SLBZS01	12-SLBZS02	12-SLBZS03	12-QZRGF01	12-QZRGF02	12-QZRGF03	12-Fenofibrate01	12-Fenofibrate02	12-Fenofibrate03
10	8.9	9.1	9	7.1	8.6	8.7	9.4	8.6	6.7	7	9.3	9.7	9.7	8.7	8.7	8.9	8.1	8.1	7.6	6.9	7.1	8.9	6.2	8.1	9.2	6	8.4	8.1	8.3	8.1	8.7	7.1	2.1	6.3	5.7	2.5
2546	268.6	286.4	338.1	282.1	297.5	324.3	412.1	382	190.3	204.7	334.4	323.5	301.4	270.3	257.4	280.2	224.4	287.4	168.6	200.2	167.2	254.2	138.9	192.7	270.3	160.5	181.7	149.3	291	153.9	209.6	183.1	56.3	144.2	87.1	38
5082	339.3	353.8	415.1	370.3	374.9	410.8	508.4	488	253.2	265.7	416.7	402.6	368.1	333.7	325.1	354	274.9	353.7	225.2	271.7	217.6	333.8	177.3	252.9	339.6	208.4	229.1	208	372.5	196	262	242.2	78.2	196.1	116.9	47.2
7618	383	392.5	462.5	416.6	415.4	464.1	560	554.9	295.8	295.3	465.8	443.7	413	377.7	361.7	393.2	306	390.5	257.5	315	248.7	382.7	206	289.5	381.4	240.6	255	247.5	420.8	227.1	292.9	282.3	89.7	226.6	141	56.5
10154	406.4	422.4	489.9	452.6	448	508.1	597.8	589.7	324	325.5	496.1	479.9	444.2	409.1	384	425.1	326.4	420.2	284.1	352.2	270.9	417.7	227.4	321.6	409.6	258.3	278.9	277.3	455.4	254.5	314	308.3	102.3	256.4	162.5	65.2
12690	429.4	441.3	511.1	481.3	473.2	534.6	620.2	625.7	349.3	345.5	519.7	502.4	469.9	430.9	407.1	448.8	341.6	439.4	309.8	378.2	289.3	443.3	241.8	340.3	431.6	273.7	294.6	300	483.3	278	333.2	331.1	111.1	272.6	179.7	73.6
15226	451	458.7	528.2	500.7	491.6	557.5	640.1	652.2	364.2	362	540.2	526.4	485.5	446.4	423.7	468.1	354.8	454.9	325.4	400.3	300.1	462	252.6	363.5	452.9	287.4	312	325.9	503.2	288.7	345.2	345	119.1	288.3	197.6	77.9
17762	462.8	478.6	539	519.1	508.6	578.4	650.6	674.1	383.3	375.7	559.1	542.5	502.6	459.9	439.3	482.6	362.4	469.3	343.4	422.3	319.4	481.9	262.1	380.4	467.3	300.9	323.6	336	519.6	305.7	358.3	361.1	127.6	301.6	210.7	86.1
20298	480.1	491.7	553.2	536.6	521.7	591.8	665	693.5	399.8	389.8	572	557.8	514.9	472.4	449.6	495.9	372.9	486.3	353.5	440.2	326.6	494.8	266.9	393.2	482.6	313.2	336.8	352.8	538.2	322.5	366.7	377.3	132	316.3	223	90.7
22834	489.8	502.7	560	549.4	533.7	611.2	675.5	704.1	411	400.3	585.3	573.5	525.8	484.5	459.4	506.4	380.9	493.8	367.8	456.1	341.2	506.2	273.9	406.1	498.1	321.9	343.7	366.8	548.3	332.8	375.2	387.8	137.7	326.7	233.5	98.5

## Sheet: chao1 index
	Normal01	Normal02	Normal03	Model01	Model02	Model03	GXZYT01	GXZYT02	GXZYT03	SLBZS01	SLBZS02	SLBZS03	QZRGF01	QZRGF02	QZRGF03	Fenofibrate01	Fenofibrate02	Fenofibrate03
8W	720.971	786.026	686.267	753.846	277.292	624.283	664.738	610.246	757.095	832.75	601.483	419.913	607.656	603.023	547.019	639.333	435.167	597.022
12W	512.255	651.185	478.658	607.246	332.333	498.452	601.194	390.958	415.333	385.865	471.552	406	306.778	341.875	482.364	364.222	613.688	546.75

## Sheet: Shannon index 
	Normal01	Normal02	Normal03	Model01	Model02	Model03	GXZYT01	GXZYT02	GXZYT03	SLBZS01	SLBZS02	SLBZS03	QZRGF01	QZRGF02	QZRGF03	Fenofibrate01	Fenofibrate02	Fenofibrate03
8W	7.093	7.749	6.364	7.121	4.224	6.635	5.377	6.655	6.6	7.383	4.924	5.519	6.811	6.575	6.24	6.718	6.234	6.511
12W	4.948	4.773	4.858	2.509	4.689	6.565	6.363	4.378	5.494	4.184	4.802	3.921	4.703	6.385	5.214	4.139	6.597	5.304

## Sheet: nmds
name	MDS1	MDS2
12-GXZYT01	-0.0365452	-0.0192675
12-GXZYT02	0.122963	-0.0445709
12-GXZYT03	0.167767	-0.0199381
12-SLBZS01	0.167833	-0.00775697
12-SLBZS02	0.115217	-0.0635974
12-SLBZS03	0.21153	0.0258093
12-Model01	0.211396	0.13891
12-Model02	0.181936	-0.0137791
12-Model03	-0.030843	-0.0891317
12-Normal01	0.119434	0.00238124
12-Normal02	0.00971612	-0.044992
12-Normal03	0.134604	0.0229128
12-QZRGF01	0.0492253	-0.000361982
12-QZRGF02	-0.0429323	-0.0461128
12-QZRGF03	0.135572	-0.0500682
12-Fenofibrate01	0.18046	0.00385468
12-Fenofibrate02	-0.0250352	-0.100046
12-Fenofibrate03	-0.0320982	0.030421
8-Fenofibrate01	-0.134012	0.0574993
8-Fenofibrate02	-0.0371004	0.0136676
8-Fenofibrate03	-0.102369	0.0388234
8-GXZYT01	-0.135881	-0.0207226
8-GXZYT02	-0.127651	0.0630853
8-GXZYT03	-0.152675	-0.0217925
8-Model01	-0.16409	0.0456721
8-Model02	0.168396	0.0643868
8-Model03	-0.16315	0.0321407
8-QZRGF01	-0.0908687	-0.00706403
8-QZRGF02	-0.0861466	0.0670053
8-QZRGF03	-0.0813179	-0.0340692
8-Normal01	-0.138143	0.00346614
8-Normal02	-0.175996	0.0108892
8-Normal03	-0.0974764	-0.0776416
8-SLBZS01	-0.156172	0.0343626
8-SLBZS02	0.0188555	-0.0573066
8-SLBZS03	0.0155964	0.0629327

[truncated: 10 more sheets: PCA, LEFSE, NAFLD Disease Data Information, Network topology parameters for, Tripartite Active Ingredient In, Tripartite GO Function Enrichme, tripartite intersection target, pathogram-HE, pathogram-Oil Red O, Abbreviations table]
